# Supplementary material for: Association of nineteen polymorphisms from seven DNA repair genes and the risk for bladder cancer in Gansu province of China
Source: PubMed Central journal article supplement (PMC5058763; doi:10.18632/oncotarget.9146), 2016-05-02
Supplement: oncotarget-07-31372-s001.pdf [file oncotarget-07-31372-s001.pdf]

## Association of nineteen polymorphisms from seven DNA repair genes and the risk for bladder cancer in Gansu province of China

### Supplementary Materials

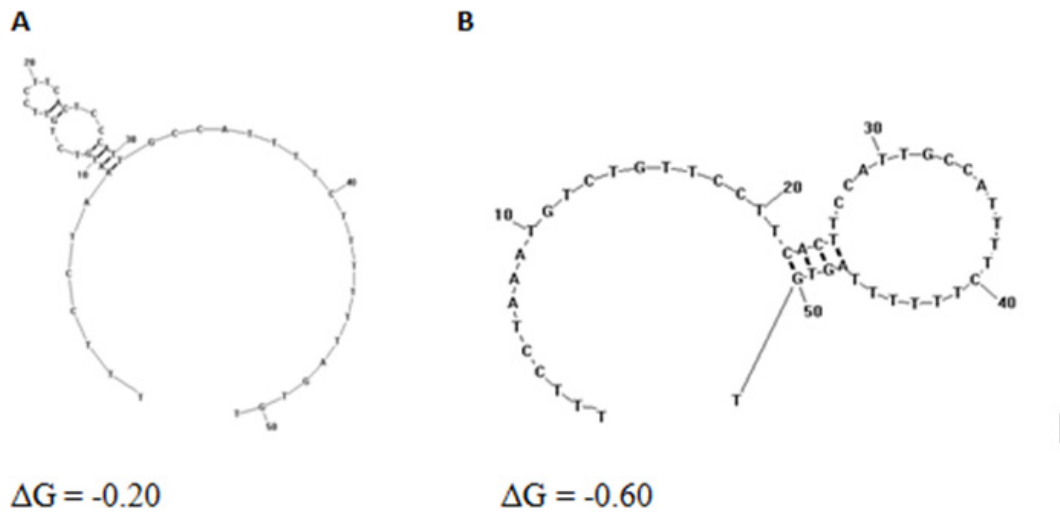

Supplementary Figure S1: Theoretically predicted RNA secondary structures in the region at rs3136817 are shown for the (A) mutant genotype TT and (B) the wild-type CC.
